# Supplementary material
Source: PubMed Central journal article supplement (PMC6592633)
Supplement: NIHMS1511607-supplement-1.pdf [file NIHMS1511607-supplement-1.pdf]

**Supplemental Information**

**Spatial organization of single mRNPs at different stages along the gene expression pathway**

Srivathsan Adivarahan, Nathan Livingston, Beth Nicholson, Samir Rahman, Bin Wu, Olivia S.

Rissland and Daniel Zenklusen\*

**\*Corresponding author:** [daniel.r.zenklusen@umontreal.ca](mailto:daniel.r.zenklusen@umontreal.ca)

## **Inventory of Supplemental Information**

Supplemental Figures 1-7

Supplemental Tables 1-3

**Supplementary Figures**

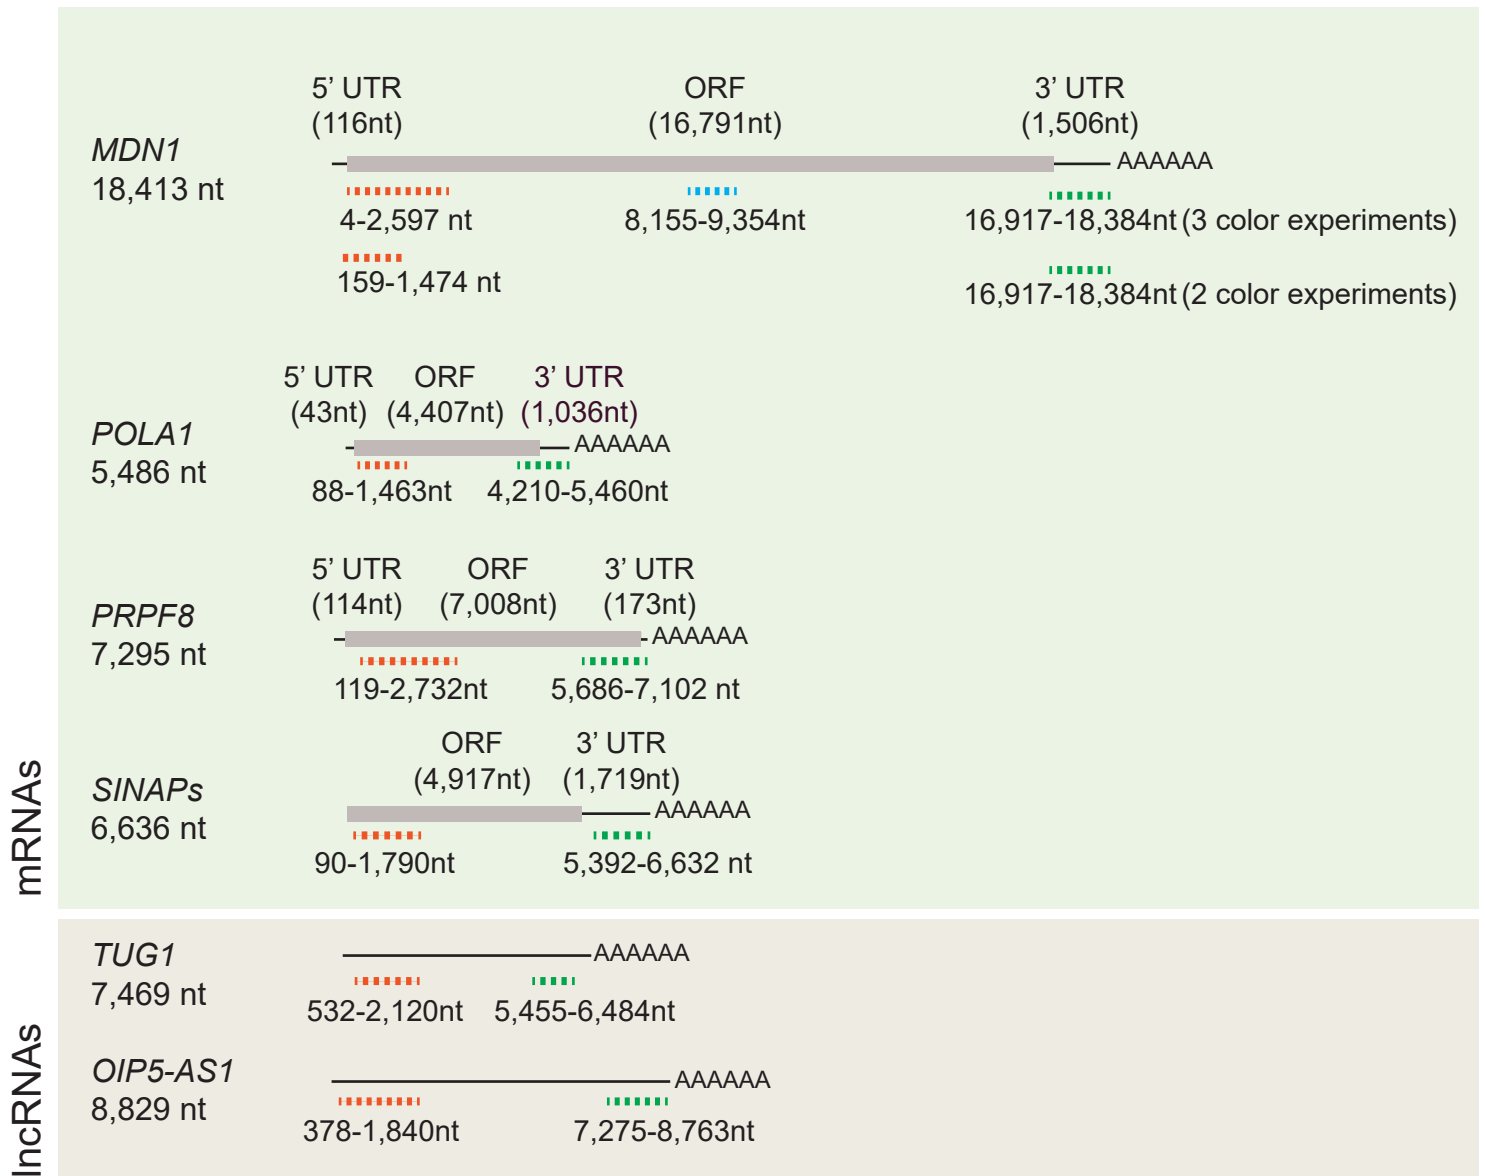

**Figure S1**

**Figure S1: Positions of smFISH probes used in this study.** Cartoons illustrating the positions of the probes used for the different genes used. See Supplemental Table 1 for probe sequences. The transcripts sequences were obtained from ensembl – *MDNI* (ENST00000369393), *POLA1* (ENST00000379068) and *PRPF8* (ENST00000304992) mRNAs and *TUG1* (ENST00000644773) and *OIP5-AS1* (ENST00000500949) lncRNAs.



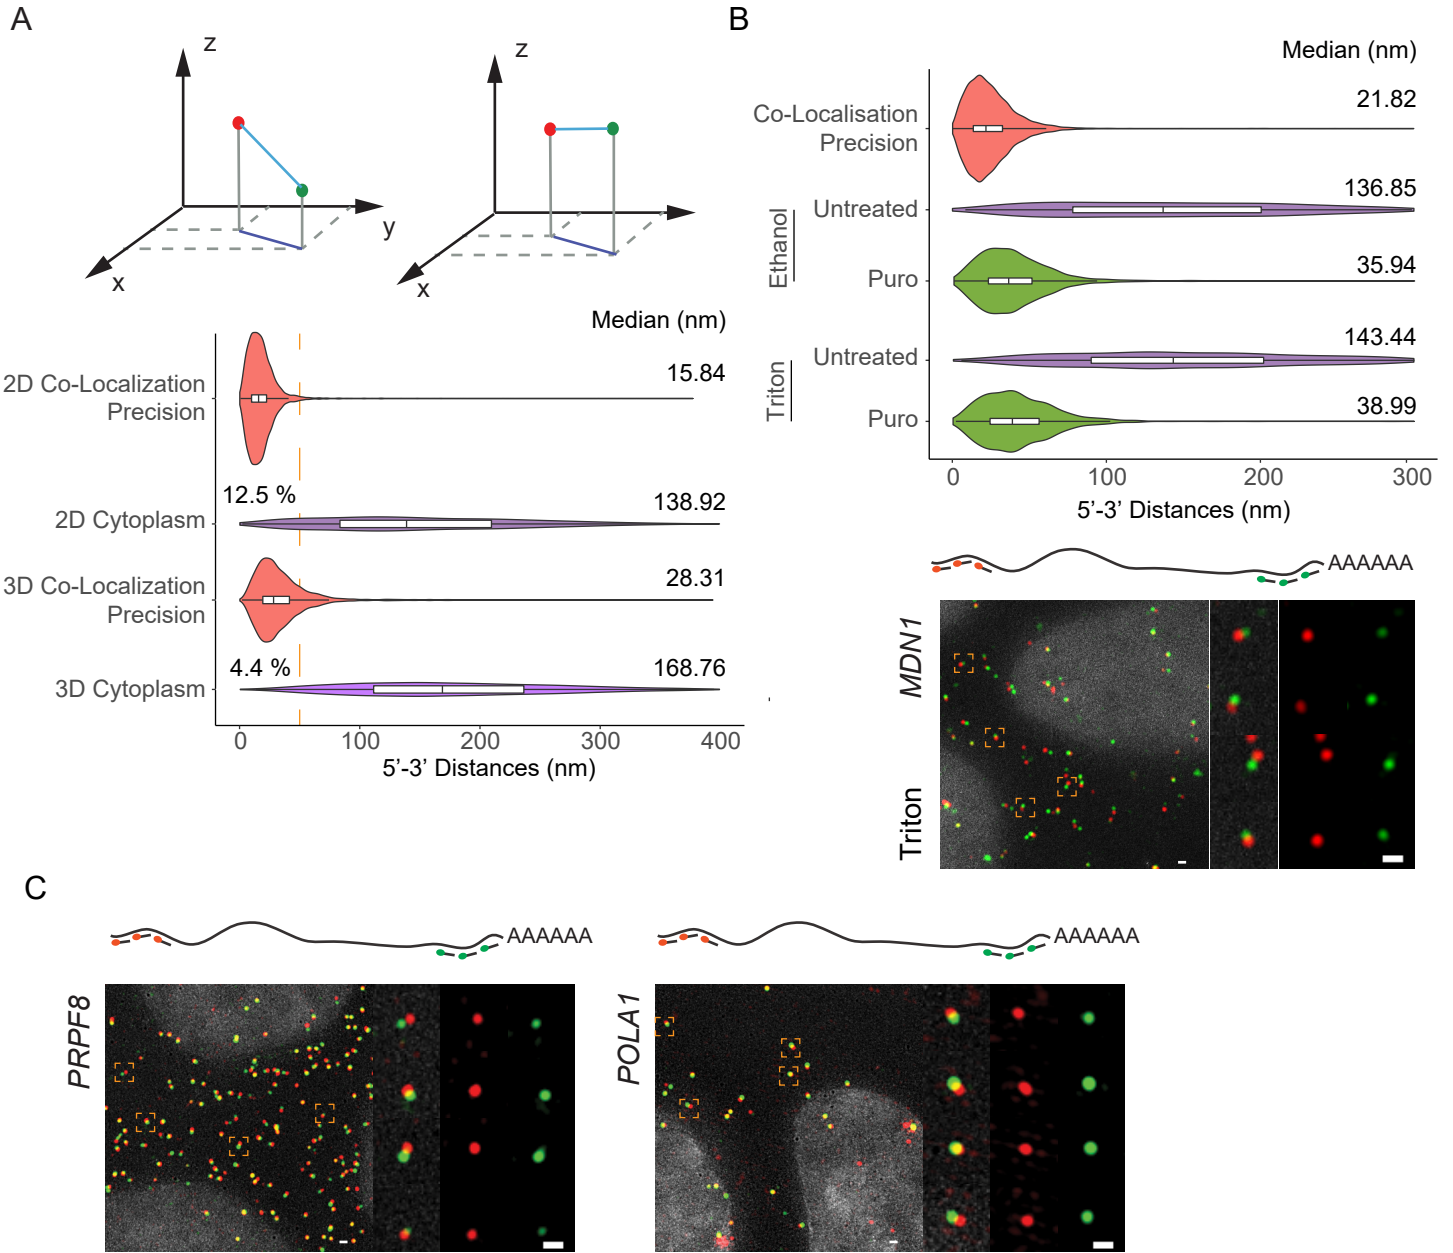

Figure S2

**Figure S2 Related to Figure 1: Visualizing mRNP conformations for *MDN1*, *POLA1* and *PRPF8* mRNAs and measurement of 5'-3' distances for *MDN1* mRNAs in 2D, 3D and in cells permeabilized using either TritonX or Ethanol** (A) Cartoon illustrating how 2D projection alters 5'-3' distances measured (above) and violin plots showing distance distribution of co-localization precision and 5'-3' distances for *MDN1* mRNAs calculated in 2D and 3D. Dotted line delineates the percentage of *MDN1* mRNAs with 5'-3' distances less than 50nm. (B) Violin plots showing distance distribution of co-localization precision (Probe Set#1, Table S3) and 5'-3' distances for *MDN1* mRNAs (Probe Set#2, Table S3) in cells permeabilized with either Ethanol or TritonX-100 (above) and smFISH images using hybridizing to the 5' and 3' ends of *MDN1* mRNAs in cells permeabilized with TritonX-100 (below), (C). smFISH images using probes hybridizing to the 5'(red) and 3'(green) ends of *PRPF8* (Probe Set#5, Table S3) and *POLA1*(Probe Set#6, Table S3) mRNAs in paraformaldehyde fixed HEK293 cells. Scale bars, 500 nm). Nuclei are visualized by DAPI staining (grey). Magnified images of individual RNAs marked by dashed squares are shown on the right. Schematic position of probes shown on top. White box plot inside the violin plot shows first quartile, median and third quartile. Median distances are shown on the right.

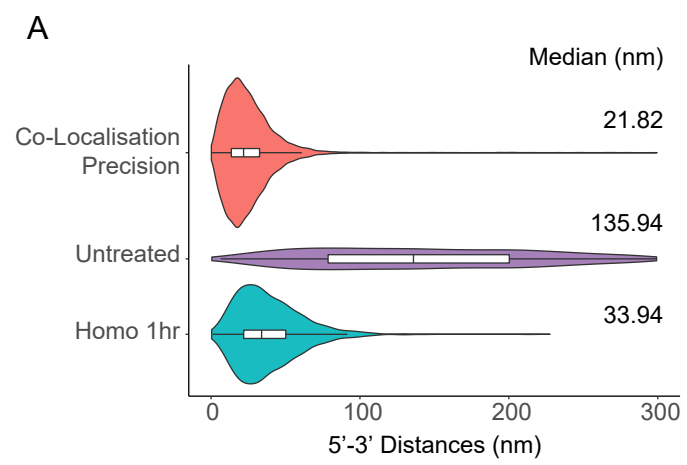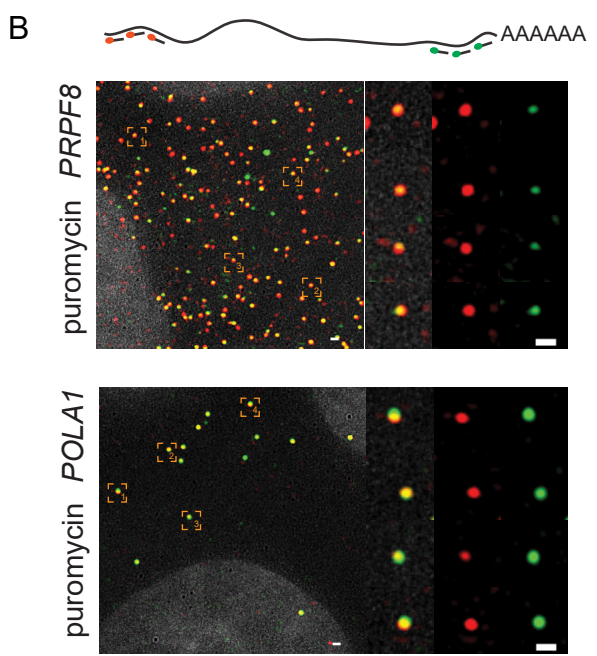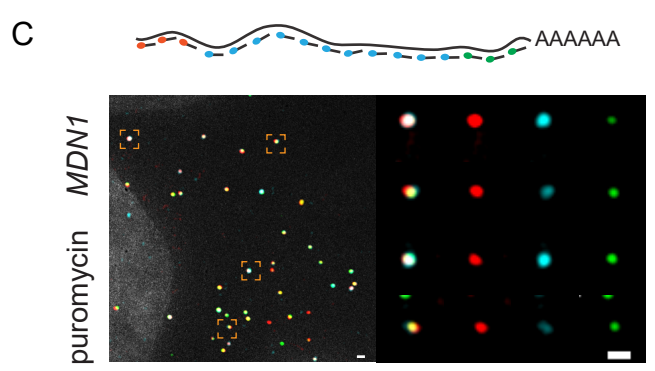

**Figure S3**

**Figure S3 Related to Figure 2: 5'-3' distance measurements for *MDN1* mRNA upon treatment with homoharringtonine and visualizing mRNP conformation of single *POLA1*, *PRPF8* and *MDN1* mRNAs when treated with puromycin.** (A) Violin plots showing distance distribution of co-localization precision (Probe Set#1, Table S3) and 5'-3' distances for *MDN1* mRNAs (Probe Set#2, Table S3) determined by Gaussian fitting from untreated and homoharringtonine (1hr) treated cells (B) smFISH images using probes hybridizing to the 5' and 3' ends of *PRPF8* (Probe Set#5, Table S3) and *POLA1* (Probe Set#6, Table S3) mRNAs in paraformaldehyde fixed HEK293 cells treated with puromycin (10 min, 100 µg/ml) (C) smFISH using 5' (red), 3' (green), and tiling (cyan) for *MDN1* mRNA (Probe Set#3, Table S3) in paraformaldehyde fixed HEK293 cells treated with puromycin (10 min, 100 µg/ml). Nuclei are visualized by DAPI staining (grey). Magnified images of individual RNAs marked by dashed squares are shown on the right. Schematic position of probes shown on top. Scale bars, 500 nm. White box plot inside the violin plot shows first quartile, median and third quartile. Median distances are shown on the right.

A

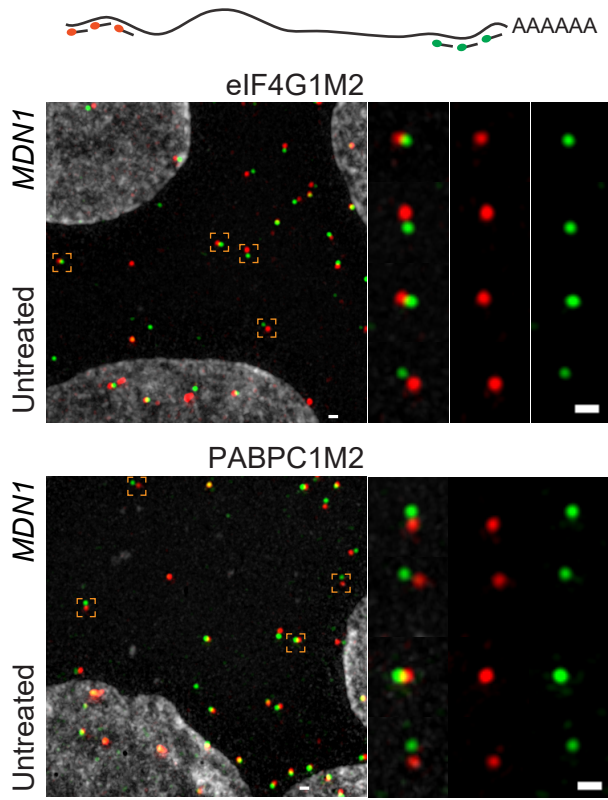

B

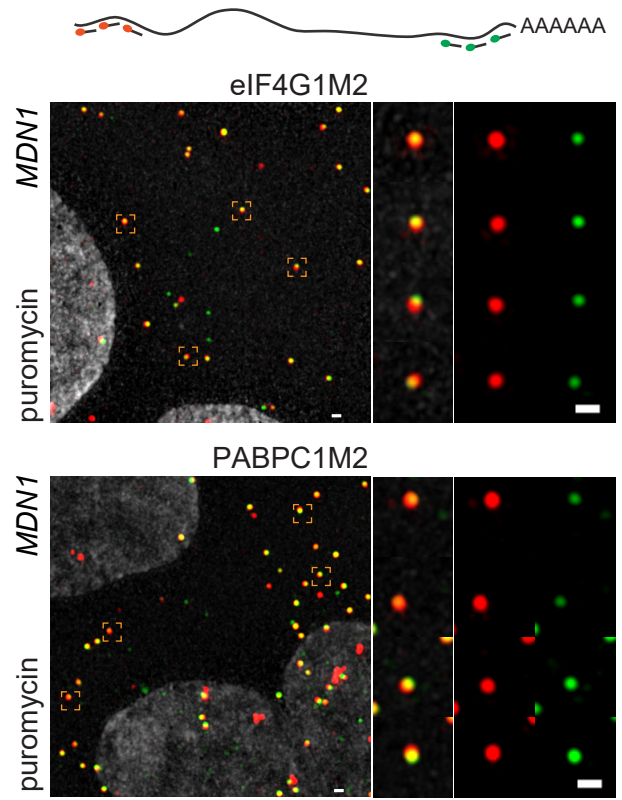

Figure S4

**Figure S4 Related to Figure 3: Visualizing mRNP conformations in mutant cell lines of PABPC1 and eIF4G1.** (A) smFISH images using probes hybridizing to the 5' (red) and 3'(green) ends (Probe Set#2, Table S3) of *MDN1* mRNA in mutant cell lines of eIF4G1 and PABPC1 in paraformaldehyde fixed HEK 293 cells. (B) smFISH images using probes hybridizing to the 5' (red) and 3' (green) ends of *MDN1* mRNA in mutant cell lines of eIF4G1 and PABPC1 in HEK 293 cells treated with puromycin (10 min, 100  $\mu$ g/ml). Nuclei are visualized by DAPI staining (grey). Magnified images of individual RNAs marked by dashed squares are shown on the right. Schematic position of probes shown on top. Scale bars, 500 nm.

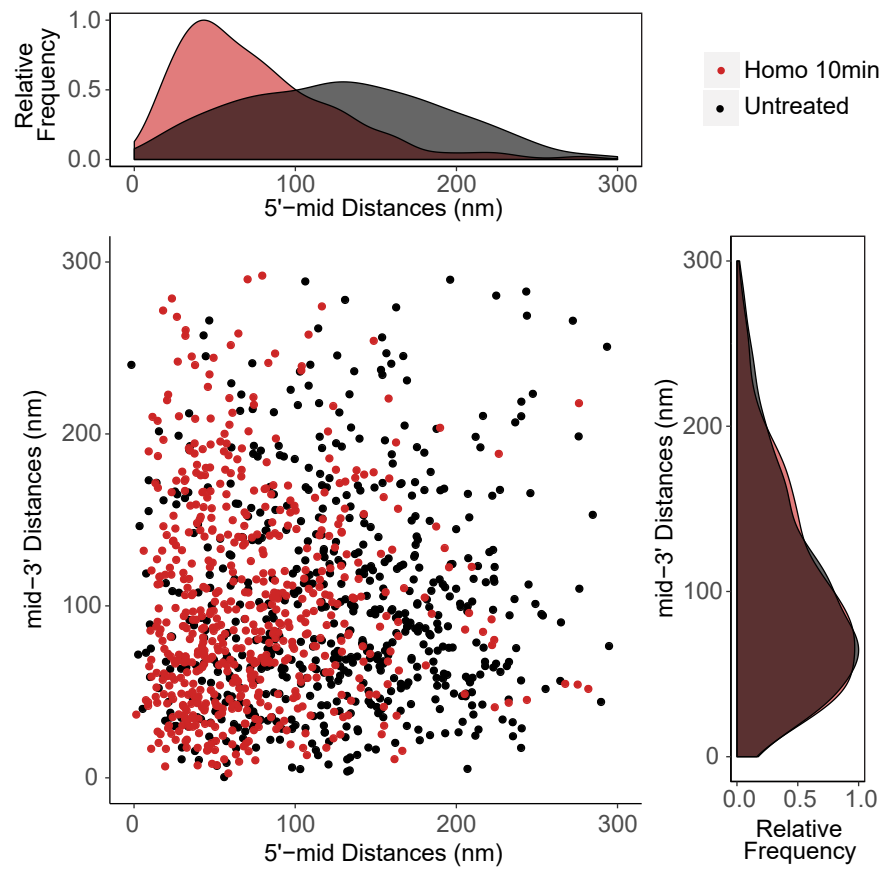

Figure S5

**Figure S5 Related to Figure 4: Compaction of the 5' end is altered upon a pulsed homoharringtonine treatment for 10min.** Scatter plot showing 5'-mid and mid-3' distances for individual cytoplasmic *MDN1* mRNAs from untreated cells (black) and cells treated with homoharringtonine (100 $\mu$ g/ml, 10min) (red). Frequency distribution are shown on top and on the right.



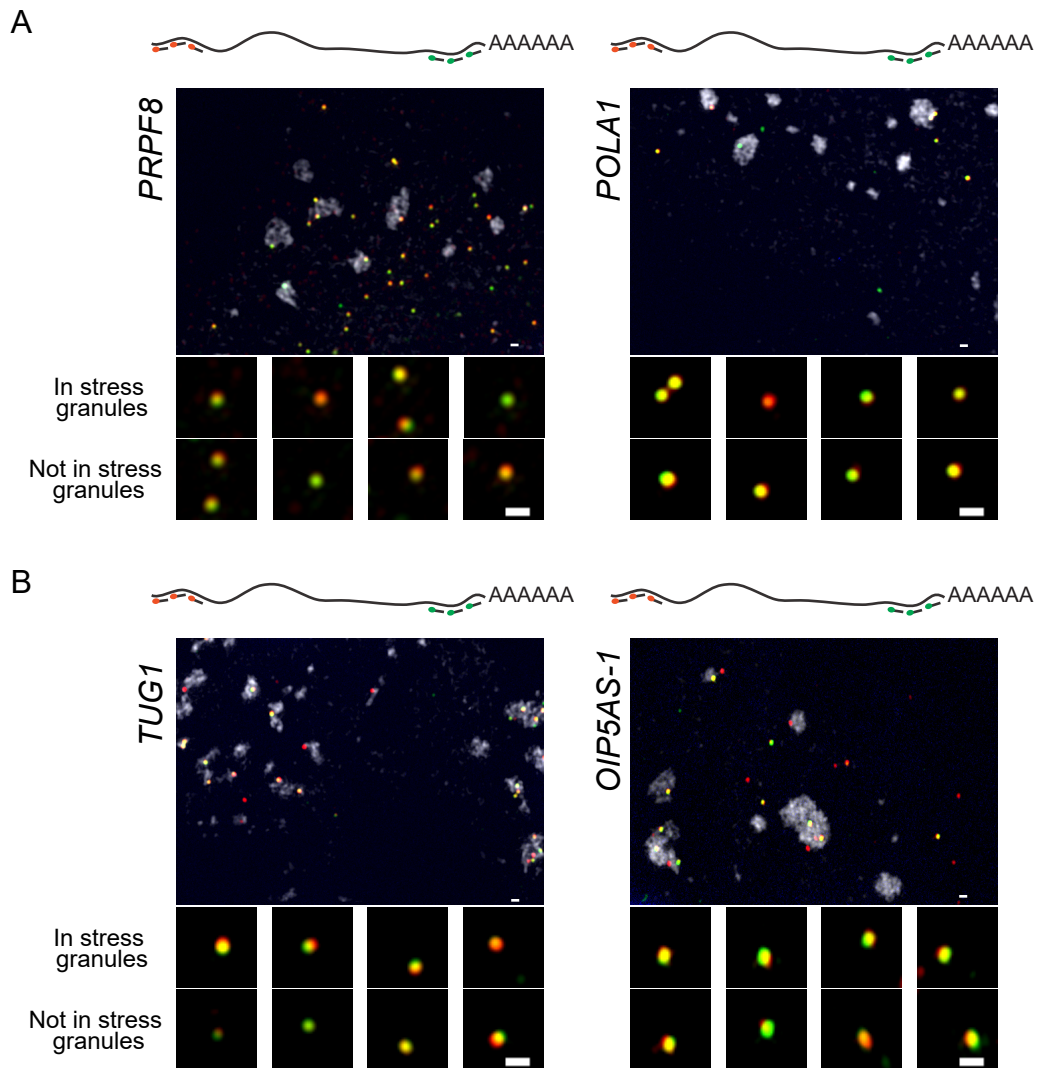

**Figure S6**

**Figure S6 Related to Figure 5: mRNA and lncRNA compaction and accumulation in stress granules.** smFISH visualizing 5' and 3' ends of *PRPF8* (Probe Set#11, Table S3) and *POLAI* (Probe Set#12, Table S3) mRNAs (A) or *TUG1* (Probe Set#13, Table S3) and *OIP5-ASI* (Probe Set#14, Table S3) lncRNAs (B) in U2OS cells treated with arsenite (1-hour, 2 mM). Only a selected cytoplasmic region of cells is shown. Stress granules are visualized using an oligo dT probe (grey). Magnified images of individual RNAs localized inside or outside of stress granules are shown on the bottom of the images. Schematic position of probes shown on top. For *POLAI* mRNAs and *OIP5-ASI* lncRNAs, not all magnified single RNAs shown in the bottom are from the corresponding image above. Scale bars, 500 nm.

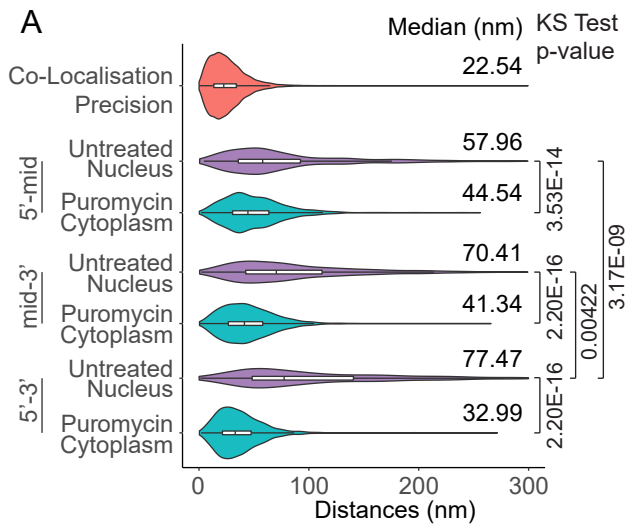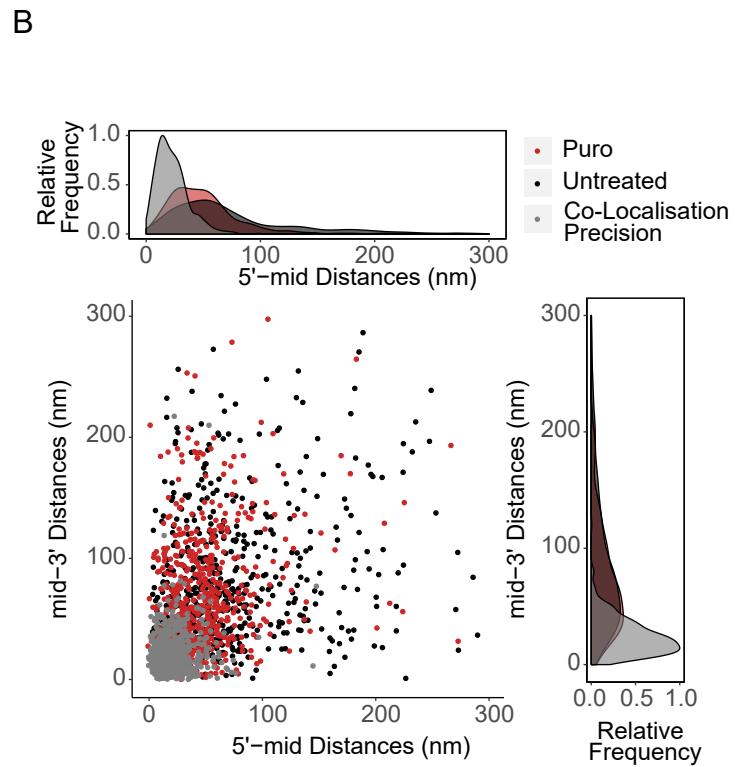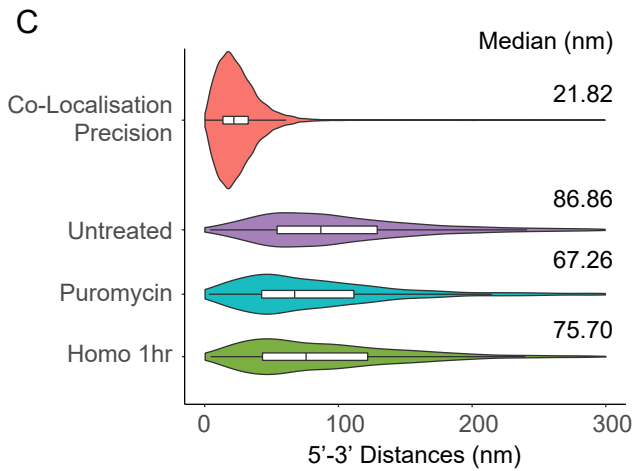

**Figure S7**

**Figure S7 Related to Figure 6: Compaction of nuclear MDN1 mRNA upon puromycin or homoharringtonine treatment.** (A) Violin plots showing distance distribution of co-localization precision (Probe Set#1, Table S3) and 5'-3' distances for *MDN1* mRNAs (Probe Set#2, Table S3) determined by Gaussian fitting from nuclear mRNAs in untreated cells and cytoplasmic mRNAs in cells treated with puromycin (100µg/ml, 10 min) (Probe Set#4, Table S3). (B) Scatter plot showing 5'-mid and mid-3' distances for individual nuclear *MDN1* mRNAs from untreated cells (black) and cells treated with puromycin (100µg/ml, 10min) (red). Co-localization precision is shown in grey. Frequency distribution are shown on top and on the right. (C) Violin plots showing distance distribution of co-localization precision (Probe Set#1, Table S3) and 5'-3' distances for *MDN1* (Probe Set#2, Table S3) mRNAs determined by Gaussian fitting from untreated, puromycin (100µg/ml, 10min) or homoharringtonine (100µg/ml, 1 hour) treated HEK293 cells. White box plot inside the violin plot shows first quartile, median and third quartile. Median distances and p-values calculated using Kolmogorov-Smirnov test are shown on the right.

## Supplementary Tables

**Table S1 Related to Figure 3:** Primers used for making CRISPR/Cas9 cells lines

| Name                                    | Sequence (5'-3')                                                    | Purpose                                                               |
|-----------------------------------------|---------------------------------------------------------------------|-----------------------------------------------------------------------|
| PABPC1 M161A<br>gRNA 1 Fw               | CACCGAATCTGTTAGCCATCTAAC<br>C                                       | Guide RNA targeting PABPC1;<br>annealed and ligated into pX330        |
| PABPC1 M161A<br>gRNA 1 Rev              | AAACGGTTAGATGGCTAACAGAT<br>T C                                      |                                                                       |
| PABPC1 region Fw<br>NotI                | GCGCACTAGCGGCCGCGAGGAAG<br>CGTTCAACTGTGA                            | To amplify 5' arm region of<br>PABPC1                                 |
| PABPC1 Not I 5' arm<br>Rev guide 1 XhoI | GCGCACTAGCGGCCGCCTCGAGA<br>CCTGGATATTTGTGAAATAAAG                   |                                                                       |
| PABPC1 BamHI 3' arm<br>Fw guide 1       | CGCGGATCCTAGATGGCTAACAG<br>ATTGTCTCTC                               | To amplify 3' arm region of<br>PABPC1                                 |
| PABPC1 region Rev<br>BamHI              | CGCGGATCCTTGGTCAGGCTGGTC<br>TCAA                                    |                                                                       |
| PABPC1 mutation Fw                      | GAAAGAGCTATTGAAAAAATGAA<br>TGGAGCGCTCCTAAATGATCGCA<br>AAGTATTTGTTGG | Internal primers for stitch PCR<br>to make PABPC1 mutation            |
| PABPC1 mutation Rev                     | CCAACAAATACTTTGCGATCATT<br>AGGAGCGCTCCATTCATTTTTTCA<br>ATAGCTCTTTC  |                                                                       |
| PABPC1 region Fw                        | GGCGAGAGATTGCGTCAAGAA                                               | Screening for puromycin<br>cassette insertion/excision                |
| PABPC1 region Rev                       | CCCTGGTAACAGGCATTTGTGAG                                             |                                                                       |
| PABP seq Fw1                            | GCAATATGGAATTCTTTTATATG                                             | To sequence PCR products from<br>PABPC1 mutant cell line<br>screening |
| PABP seq Fw2                            | GGAAGTGTGCAGTAATGGATATC                                             |                                                                       |
| PABP seq Rev1                           | CAATCTTGTCGCCCAGACTGG                                               |                                                                       |
| eIF4G1 mutant gRNA<br>1 Fw              | CACCGTGCTGCTGGGACATTGTGC                                            | Guide RNA targeting eIF4G1;<br>annealed and ligated into pX330        |
| eIF4G1 mutant gRNA<br>1 Rev             | AAACGCACAATGTCCCAGCAGCA<br>C                                        |                                                                       |
| eIF4G1 5' HR Arm Fw<br>NotI             | GCGCACTAGCGGCCGC<br>GAGACAGGAAGTAGACTCAAG                           | To amplify 5' arm region of<br>eIF4G1                                 |
| eIF4G1 5' HR Arm Rev<br>NotI XhoI       | GCGCACTAGCGGCCGC CTCGAG<br>CAATGTCCCAGCAGCACCTGACC                  |                                                                       |
| eIF4G1 3' HR Arm Fw<br>BamHI            | CGC GGATCC<br>TGCCGGAAAGAGCAGTACTTG                                 | To amplify 3' arm region of<br>eIF4G1                                 |
| eIF4G1 3' HR Arm Rev<br>BamHI           | CGC GGATCC<br>GGCACCTATTCTGGGCACC                                   |                                                                       |
| eIF4G1 mutation Fw                      | TGCAGCCGCTGCCGCGGGAGCAA<br>TCTGGGGTGGCTGGTTC                        | Internal primers for stitch PCR<br>to make eIF4G1 mutation            |
| eIF4G1 mutation Rev                     | CGCCAGTGGGAAACTGCTGCACCCCTTGG<br>GCTGGATAGTAGG                      |                                                                       |

|                   |                        |                                                                |
|-------------------|------------------------|----------------------------------------------------------------|
| eIF4G1 region Fw  | GTAGTCGCACAGTCTTGGCTC  | Screening for puromycin cassette insertion/excision            |
| eIF4G1 region Rev | GAGTCCAGGGCAGAACAGAC   |                                                                |
| 4G seq Rev1       | CACCCCTCGTAGGCAGGCACTC | To sequence PCR products from eIF4G mutant cell line screening |
| 4G seq Fw 1       | CAGAGTATGTGTGTACATGTTG |                                                                |
| 4G seq Rev2       | CTTCCTCGCTAGGCACTTCAG  |                                                                |
| 4G seq Rev 3      | CCAGCAGTCCCCAAGTCAGTGG |                                                                |

**Table S2 Related to Figure S1:** List of smFISH probes used (see attached excel file)

**Table S3 Related to Figure S1 and Table S2: Probe and antibody combinations used**

| <b>Probe Set #</b> | <b>Experiment</b>              | <b>Combination of probes/antibodies and dyes used (From Table S2)</b>                                  |
|--------------------|--------------------------------|--------------------------------------------------------------------------------------------------------|
| 1                  | MDN1 middle alternating probes | MDN1 middle odd – Cy5<br>MDN1 middle even – Cy3                                                        |
| 2                  | MDN1 5'-3'                     | MDN1 5' -Cy5<br>MDN1 3' - Dy550                                                                        |
| 3                  | MDN1 5'-tiling-3'              | MDN1 5'+ MDN1 5' additional – Dy488<br>MDN1 tiling – Cy5<br>MDN 3' – Dy550                             |
| 4                  | MDN1 5'-middle-3'              | MDN1 5'+ MDN1 5' additional – Dy488<br>MDN1 middle – Cy5<br>MDN 3' – Dy550                             |
| 5                  | PRPF8 5'-3'                    | PRPF8 5' -Cy5<br>PRPF8 3' - Cy3                                                                        |
| 6                  | POLA1 5'-3'                    | POLA1 5' -Cy3<br>POLA1 3' - Cy5                                                                        |
| 7                  | TUG1 5'-3'                     | TUG1 5' -Cy5<br>TUG1 3' - Cy3                                                                          |
| 8                  | OIP5-AS1 5'-3'                 | OIP5-AS1 5' -Cy5<br>OIP5-AS1 3' - Cy3                                                                  |
| 9                  | MDN1 5'-3'-dT                  | MDN1 5' -Cy5<br>MDN1 3' - Dy550<br>dT – Cy2                                                            |
| 10                 | MDN1 tiling-3'-dT              | MDN1 tiling + MDN1 tiling additional – Cy5<br>MDN1 3' – Dy550<br>dT - Cy2                              |
| 11                 | PRPF8 5'-3'-dT                 | PRPF8 5' -Cy5<br>PRPF8 3' - Cy3<br>dT – Cy2                                                            |
| 12                 | POLA1 5'-3'-dT                 | POLA1 5' -Cy3<br>POLA1 3' - Cy5<br>dT – Cy2                                                            |
| 13                 | TUG1 5'-3'-dT                  | TUG1 5' -Cy5<br>TUG1 3' - Cy3<br>dT – Cy2                                                              |
| 14                 | OIP5-AS1 5'-3'-dT              | OIP5-AS1 5' -Cy5<br>OIP5-AS1 3' - Cy3<br>dT – Cy2                                                      |
| 15                 | SINAPs 5'-3'                   | SuntagV4 5' – Quasar 570<br>MS2v5 3' – Cy5<br>Chicken anti-GFP Antibody<br>Goat-Anti Chicken Alexa 488 |
